# Supplementary material
Source: Springer Nature journal article supplement (https://www.springermedizin.de/resource/supplementary/12903_2013_362_MOESM1_ESM.pdf/9516828)
Supplement: MOESM1 [file 9516828]

Total invited  
(n=480)

Dentists invited  
(n=196)

Laypersons invited  
(n=284)

Refused to participate  
(n=1)

Refused to participate  
(n=4)  
Incomplete questionnaires  
(n=3)

Dentists participants  
(n=195)

Laypersons  
(n=277)
